# Supplementary material for: Characterisation of prodromal and very early psoriatic arthritis: a systematic literature review informing a EULAR taskforce
Source: PubMed Central journal article supplement — RMD Open. 2023 Jun 22;9(2):e003143. doi: 10.1136/rmdopen-2023-003143 (PMC10314670; doi:10.1136/rmdopen-2023-003143), 2023-06-22
Supplement: rmdopen-2023-003143supp001.pdf [file rmdopen-2023-003143supp001.pdf]

**Ovid MEDLINE(R) ALL <1946 to October 22, 2021>**

|    |                                                       |         |
|----|-------------------------------------------------------|---------|
| 1  | Psoriasis/                                            | 38133   |
| 2  | psoriasis.mp.                                         | 52296   |
| 3  | psoriasis.mp.                                         | 7       |
| 4  | pustulosis.mp.                                        | 2594    |
| 5  | (psoriasiform adj3 (dermat* or lesion* or rash*)).mp. | 592     |
| 6  | (psoriatic adj3 (rash* or epidermis or skin)).mp.     | 3135    |
| 7  | 1 or 2 or 3 or 4 or 5 or 6                            | 54417   |
| 8  | Arthritis, Psoriatic/                                 | 6985    |
| 9  | (psoria* adj3 arthr*).mp.                             | 13145   |
| 10 | alibert bazin.mp.                                     | 12      |
| 11 | (psoria* adj3 rheum*).mp.                             | 2244    |
| 12 | (psoria* adj3 polyarth*).mp.                          | 93      |
| 13 | (psoria* adj3 poly-arth*).mp.                         | 2       |
| 14 | 8 or 9 or 10 or 11 or 12 or 13                        | 13378   |
| 15 | 7 and 14                                              | 7315    |
| 16 | (comment or editorial or letter).pt.                  | 2005105 |
| 17 | 15 not 16                                             | 6951    |
| 18 | limit 17 to dt=20210713-20211022                      | 183     |

**Embase <1974 to 2021 October 22>**

|    |                                                                                                                                                                                                |         |
|----|------------------------------------------------------------------------------------------------------------------------------------------------------------------------------------------------|---------|
| 1  | psoriasis/ or erythrodermic psoriasis/ or experimental psoriasis/ or guttate psoriasis/ or nail psoriasis/ or parapsoriasis/ or psoriasis vulgaris/ or pustular psoriasis/ or scalp psoriasis/ | 77752   |
| 2  | psoriasis.mp.                                                                                                                                                                                  | 88511   |
| 3  | psoriasis.mp.                                                                                                                                                                                  | 29      |
| 4  | pustulosis.mp.                                                                                                                                                                                 | 5693    |
| 5  | (psoriasiform adj3 (dermat* or lesion* or rash*)).mp.                                                                                                                                          | 1026    |
| 6  | (psoriatic adj3 (rash* or epidermis or skin)).mp.                                                                                                                                              | 4558    |
| 7  | 1 or 2 or 3 or 4 or 5 or 6                                                                                                                                                                     | 92798   |
| 8  | psoriatic arthritis/                                                                                                                                                                           | 26095   |
| 9  | (psoria* adj3 arthr*).mp.                                                                                                                                                                      | 30378   |
| 10 | alibert bazin.mp.                                                                                                                                                                              | 19      |
| 11 | (psoria* adj3 rheum*).mp.                                                                                                                                                                      | 4309    |
| 12 | (psoria* adj3 polyarth*).mp.                                                                                                                                                                   | 169     |
| 13 | (psoria* adj3 poly-arth*).mp.                                                                                                                                                                  | 0       |
| 14 | 8 or 9 or 10 or 11 or 12 or 13                                                                                                                                                                 | 30692   |
| 15 | 7 and 14                                                                                                                                                                                       | 16147   |
| 16 | (editorial or letter or note).pt.                                                                                                                                                              | 2770702 |
| 17 | 15 not 16                                                                                                                                                                                      | 15076   |
| 18 | limit 17 to dc=20210711-20211022                                                                                                                                                               | 670     |

**Cochrane Library**

| ID  | Search                                                                     | Hits |
|-----|----------------------------------------------------------------------------|------|
| #1  | MeSH descriptor: [Psoriasis] this term only                                | 3106 |
| #2  | (psoriasis):ti,ab,kw                                                       | 8514 |
| #3  | (psoriasis):ti,ab,kw                                                       | 3    |
| #4  | (pustulosis):ti,ab,kw                                                      | 157  |
| #5  | ((psoriasiform near/3 (dermat* or lesion* or rash*)):ti,ab,kw              | 0    |
| #6  | ((psoriatic near/3 (rash* or epidermis or skin)):ti,ab,kw                  | 233  |
| #7  | #1 or #2 or #3 or #4 or #5 or #6                                           | 8578 |
| #8  | MeSH descriptor: [Arthritis, Psoriatic] this term only                     | 494  |
| #9  | (psoria* near/3 arthr*):ti,ab,kw                                           | 2509 |
| #10 | ("alibert bazin"):ti,ab,kw                                                 | 2    |
| #11 | (psoria* near/3 rheum*):ti,ab,kw                                           | 385  |
| #12 | (psoria* near/3 polyarth*):ti,ab,kw                                        | 5    |
| #13 | (psoria* near/3 poly-art*):ti,ab,kw                                        | 0    |
| #14 | #8 or #9 or #10 or #11 or #12 or #13                                       | 2520 |
| #15 | #7 and #14 with Cochrane Library publication date from Jul 2021 to present | 0    |

**Ovid MEDLINE(R) ALL <1946 to October 22, 2021>**

|    |                                                                                                                                 |         |
|----|---------------------------------------------------------------------------------------------------------------------------------|---------|
| 1  | Arthritis, Psoriatic/                                                                                                           | 6985    |
| 2  | (psoria* adj3 arthr*).mp.                                                                                                       | 13145   |
| 3  | alibert bazin.mp.                                                                                                               | 12      |
| 4  | (psoria* adj3 rheum*).mp.                                                                                                       | 2244    |
| 5  | (psoria* adj3 polyarth*).mp.                                                                                                    | 93      |
| 6  | (psoria* adj3 poly-arth*).mp.                                                                                                   | 2       |
| 7  | 1 or 2 or 3 or 4 or 5 or 6                                                                                                      | 13378   |
| 8  | ((undifferentiate* or early or probable or unclassif* or inflammat*) adj3 (arth* or polyarth* or poly-arth* or oligoarth*)).mp. | 17579   |
| 9  | 7 and 8                                                                                                                         | 1716    |
| 10 | (comment or editorial or letter).pt.                                                                                            | 2005105 |
| 11 | 9 not 10                                                                                                                        | 1687    |
| 12 | limit 11 to dt=20210713-20211022                                                                                                | 37      |

**Embase <1974 to 2021 October 22>**

|    |                                                                                                                                |         |
|----|--------------------------------------------------------------------------------------------------------------------------------|---------|
| 1  | psoriatic arthritis/                                                                                                           | 26095   |
| 2  | (psoria* adj3 arthr*).mp.                                                                                                      | 30378   |
| 3  | alibert bazin.mp.                                                                                                              | 19      |
| 4  | (psoria* adj3 rheum*).mp.                                                                                                      | 4309    |
| 5  | (psoria* adj3 polyarth*).mp.                                                                                                   | 169     |
| 6  | (psoria* adj3 poly-arth*).mp.                                                                                                  | 0       |
| 7  | 1 or 2 or 3 or 4 or 5 or 6                                                                                                     | 30692   |
| 8  | ((undifferentiate* or early or probable or unclassif* or inflammat*) adj3 (arth* or polyarth* or poly-arth* or oligoarth*).mp. | 30663   |
| 9  | 7 and 8                                                                                                                        | 3972    |
| 10 | (editorial or letter or note).pt.                                                                                              | 2770702 |
| 11 | 9 not 10                                                                                                                       | 3923    |
| 12 | limit 11 to dc=20210711-20211022                                                                                               | 188     |

**Cochrane Library**

| ID | Search                                                                                                                                | Hits |
|----|---------------------------------------------------------------------------------------------------------------------------------------|------|
| #1 | ((undifferentiate* or early or probable or unclassif* or inflammat*) near/3 (arth* or polyarth* or poly-arth or oligoarth*)):ti,ab,kw | 2332 |
| #2 | MeSH descriptor: [Arthritis, Psoriatic] this term only                                                                                | 494  |
| #3 | (psoria* near/3 arthr*):ti,ab,kw                                                                                                      | 2509 |
| #4 | ("alibert bazin"):ti,ab,kw                                                                                                            | 2    |
| #5 | (psoria* near/3 rheum*):ti,ab,kw                                                                                                      | 385  |
| #6 | (psoria* near/3 polyarth*):ti,ab,kw                                                                                                   | 5    |
| #7 | (psoria* near/3 poly-arth*):ti,ab,kw                                                                                                  | 0    |
| #8 | #2 or #3 or #4 or #5 or #6 or #7                                                                                                      | 2520 |
| #9 | #1 and #8 with Cochrane Library publication date from Jul 2021 to present                                                             | 7    |
